# Supplementary material
Source: PubMed Central journal article supplement (PMC1544243)
Supplement: pnas_0603179103_1.pdf [file pnas_0603179103_1.pdf]

**Table 3. Genes that interact positively with the *mce1* locus**

| Rv# designation | Systematic name | Wild-type background ratio ( <i>in vivo/in vitro</i> ) | <i>Δmce1</i> background ratio ( <i>in vivo/in vitro</i> ) | Functional category                     | Interacts with both <i>Δmce1</i> and <i>Δmce4</i> | Putative suppressor |
|-----------------|-----------------|--------------------------------------------------------|-----------------------------------------------------------|-----------------------------------------|---------------------------------------------------|---------------------|
| Rv0173          | lprK            | 0.118                                                  | 4.259                                                     | Transport                               |                                                   | Yes                 |
| Rv0218          | Rv0218          | 0.386                                                  | 1.422                                                     | Cell wall and cell processes            |                                                   |                     |
| Rv0427c         | xthA            | 0.541                                                  | 3.973                                                     | Information pathways                    |                                                   | Yes                 |
| Rv0490          | senX3           | 0.402                                                  | 3.215                                                     | Regulatory proteins                     |                                                   | Yes                 |
| Rv0655          | mceG            | 0.077                                                  | 0.478                                                     | Transport                               | Yes                                               |                     |
| Rv1016c         | lpgT            | 0.167                                                  | 1.329                                                     | Cell wall and cell processes            |                                                   |                     |
| Rv1028c         | kdpD            | 0.153                                                  | 0.943                                                     | Regulatory proteins                     |                                                   |                     |
| Rv1184c         | Rv1184c         | 0.357                                                  | 0.77                                                      | Cell wall and cell processes            | Yes                                               |                     |
| Rv1236          | sugA            | 0.187                                                  | 1.545                                                     | Transport                               |                                                   |                     |
| Rv1304          | atpB            | 0.282                                                  | 0.895                                                     | Intermediary metabolism and respiration |                                                   |                     |
| Rv1410c         | Rv1410c         | 0.105                                                  | 1.565                                                     | Transport                               |                                                   |                     |
| Rv1422          | Rv1422          | 0.476                                                  | 1.412                                                     | Conserved hypotheticals                 | Yes                                               |                     |
| Rv1460          | Rv1460          | 0.342                                                  | 4.221                                                     | Regulatory proteins                     | Yes                                               | Yes                 |
| Rv1569          | bioF            | 0.043                                                  | 0.599                                                     | Intermediary metabolism and respiration | Yes                                               |                     |
| Rv1821          | secA2           | 0.453                                                  | 2.945                                                     | Transport                               |                                                   | Yes                 |
| Rv2038c         | Rv2038c         | 0.429                                                  | 1.627                                                     | Transport                               | Yes                                               |                     |
| Rv2483c         | Rv2483c         | 0.351                                                  | 2.06                                                      | Lipid metabolism                        |                                                   | Yes                 |
| Rv2692          | trkB            | 0.477                                                  | 1.319                                                     | Cell wall and cell processes            |                                                   |                     |
| Rv2734          | Rv2734          | 0.253                                                  | 2.247                                                     | Conserved hypotheticals                 |                                                   | Yes                 |
| Rv2936          | drrA            | 0.361                                                  | 1.59                                                      | Lipid metabolism                        | Yes                                               |                     |
| Rv3103c         | Rv3103c         | 0.328                                                  | 1.819                                                     | Conserved hypotheticals                 | Yes                                               |                     |
| Rv3168          | Rv3168          | 0.323                                                  | 1.943                                                     | Conserved hypotheticals                 |                                                   |                     |
| Rv3246c         | mtrA            | 0.206                                                  | 0.914                                                     | Regulatory proteins                     |                                                   |                     |
| Rv3258c         | Rv3258c         | 0.383                                                  | 1.917                                                     | Conserved hypotheticals                 |                                                   |                     |
| Rv3270          | ctpC            | 0.602                                                  | 1.436                                                     | Transport                               |                                                   |                     |
| Rv3277          | Rv3277          | 0.317                                                  | 1.975                                                     | Cell wall and cell processes            |                                                   |                     |
| Rv3472          | Rv3472          | 0.357                                                  | 1.116                                                     | Conserved hypotheticals                 |                                                   |                     |
| Rv3540c         | ltp2            | 0.144                                                  | 0.893                                                     | Lipid metabolism                        | Yes                                               |                     |
| Rv3541c         | Rv3541c         | 0.114                                                  | 1.203                                                     | Lipid metabolism                        |                                                   |                     |
| Rv3542c         | Rv3542c         | 0.113                                                  | 1.353                                                     | Lipid metabolism                        |                                                   |                     |
| Rv3717          | Rv3717          | 0.824                                                  | 2.339                                                     | Conserved hypotheticals                 |                                                   | Yes                 |
| Rv3794          | embA            | 0.167                                                  | 0.74                                                      | Cell wall and cell processes            |                                                   |                     |
| Rv3877          | Rv3877          | 0.133                                                  | 1.202                                                     | Cell wall and cell processes            |                                                   |                     |
| Rv3882c         | Rv3882c         | 0.132                                                  | 0.296                                                     | Cell wall and cell processes            |                                                   |                     |
| Rv3910          | Rv3910          | 0.194                                                  | 0.388                                                     | Cell wall and cell processes            |                                                   |                     |
