# Supplementary material
Source: PubMed Central journal article supplement (PMC1544243)
Supplement: pnas_0603179103_2.pdf [file pnas_0603179103_2.pdf]

**Table 4. Genes that interact positively with the *mce4* locus**

| Rv# designation | Systematic name | Wild-type background ratio ( <i>in vivo/in vitro</i> ) | $\Delta mce4$ background ratio ( <i>in vivo/in vitro</i> ) | Functional category                     | Interacts with both $\Delta mce1$ and $\Delta mce4$ | Putative suppressor |
|-----------------|-----------------|--------------------------------------------------------|------------------------------------------------------------|-----------------------------------------|-----------------------------------------------------|---------------------|
| Rv0098          | Rv0098          | 0.391                                                  | 1.906                                                      | Conserved hypotheticals                 |                                                     |                     |
| Rv0655          | mceG            | 0.0449                                                 | 0.194                                                      | Transport                               | Yes                                                 |                     |
| Rv0670          | end             | 0.774                                                  | 2.608                                                      | Information pathways                    |                                                     | Yes                 |
| Rv1184c         | Rv1184c         | 0.532                                                  | 4.364                                                      | Cell wall and cell processes            | Yes                                                 | Yes                 |
| Rv1185c         | fadD21          | 0.759                                                  | 3.534                                                      | Lipid metabolism                        |                                                     | Yes                 |
| Rv1410c         | Rv1410c         | 0.0381                                                 | 0.358                                                      | Transport                               | Yes                                                 |                     |
| Rv1411c         | lprG            | 0.0739                                                 | 0.215                                                      | Transport                               |                                                     |                     |
| Rv1422          | Rv1422          | 0.207                                                  | 1.069                                                      | Conserved hypotheticals                 | Yes                                                 |                     |
| Rv1460          | Rv1460          | 0.772                                                  | 17.56                                                      | Regulatory proteins                     | Yes                                                 | Yes                 |
| Rv1469          | ctpD            | 0.633                                                  | 1.536                                                      | Transport                               |                                                     |                     |
| Rv1807          | Rv1807          | 0.359                                                  | 1.776                                                      | Conserved hypotheticals                 |                                                     |                     |
| Rv1974          | Rv1974          | 0.503                                                  | 3.278                                                      | Cell wall and cell processes            |                                                     | Yes                 |
| Rv2004c         | Rv2004c         | 0.84                                                   | 3.472                                                      | Conserved hypotheticals                 |                                                     | Yes                 |
| Rv2038c         | Rv2038c         | 0.495                                                  | 1.852                                                      | Transport                               | Yes                                                 |                     |
| Rv2936          | drrA            | 0.25                                                   | 1.081                                                      | Lipid metabolism                        | Yes                                                 |                     |
| Rv2938          | drrC            | 0.28                                                   | 0.754                                                      | Lipid metabolism                        |                                                     |                     |
| Rv3103c         | Rv3103c         | 0.449                                                  | 0.921                                                      | Conserved hypotheticals                 | Yes                                                 |                     |
| Rv3178          | Rv3178          | 0.794                                                  | 2.331                                                      | Conserved hypotheticals                 |                                                     | Yes                 |
| Rv3210c         | Rv3210c         | 0.601                                                  | 2.178                                                      | Conserved hypotheticals                 |                                                     | Yes                 |
| Rv3371          | Rv3371          | 0.258                                                  | 1.055                                                      | Conserved hypotheticals                 |                                                     |                     |
| Rv3375          | amiD            | 0.418                                                  | 2.147                                                      | Intermediary metabolism and respiration |                                                     | Yes                 |
| Rv3400          | Rv3400          | 0.269                                                  | 0.839                                                      | Intermediary metabolism and respiration |                                                     |                     |
| Rv3502c         | Rv3502c         | 0.267                                                  | 0.762                                                      | Intermediary metabolism and respiration |                                                     |                     |
| Rv3540c         | ltp2            | 0.113                                                  | 0.421                                                      | Lipid metabolism                        | Yes                                                 |                     |
| Rv3544c         | fadE28          | 0.054                                                  | 0.461                                                      | Lipid metabolism                        |                                                     |                     |
| Rv3551          | Rv3551          | 0.251                                                  | 0.891                                                      | Intermediary metabolism and respiration |                                                     |                     |
| Rv3556c         | fadA6           | 0.258                                                  | 1.73                                                       | Lipid metabolism                        |                                                     |                     |
| Rv3563          | fadE32          | 0.128                                                  | 0.85                                                       | Lipid metabolism                        |                                                     |                     |
| Rv3631          | Rv3631          | 0.368                                                  | 3.723                                                      | Intermediary metabolism and respiration |                                                     | Yes                 |
| Rv3723          | Rv3723          | 0.089                                                  | 0.353                                                      | Cell wall and cell processes            |                                                     |                     |
| Rv3855          | Rv3855          | 0.486                                                  | 1.657                                                      | Regulatory proteins                     |                                                     |                     |
